# Supplementary material for: Investigating public support for biosecurity measures to mitigate pathogen transmission through the herpetological trade
Source: PLOS journal article supplement (doi:10.1371/journal.pone.0262719), 2022-01-21
Supplement: S25 (10.1371/journal.pone.0262719.s025) [file journal.pone.0262719.s025]

**S23 Table. Distribution of responses to the Environmental Portrait Value Questionnaire: “Below are some statements about a random man/woman/person. How similar is this person to you?” (n=2,007).**

|                                                                           |  | Median | Percent of respondents |      |      |      |      |      |      |
|---------------------------------------------------------------------------|--|--------|------------------------|------|------|------|------|------|------|
|                                                                           |  |        | 1†                     | 2    | 3    | 4    | 5    | 6    | 7    |
| Biospheric values:                                                        |  |        |                        |      |      |      |      |      |      |
| It is important to him/her/them to prevent environmental pollution        |  | 6      | 1.5                    | 1.7  | 2.8  | 13.7 | 21.8 | 25.5 | 33.1 |
| It is important to him/her/them to protect the environment                |  | 6      | 0.9                    | 1.0  | 2.4  | 9.2  | 19.4 | 26.2 | 40.9 |
| It is important to him/her/them to respect nature                         |  | 7      | 0.1                    | 0.5  | 1.3  | 5.6  | 15.5 | 26.6 | 50.4 |
| It is important to him/her/them to be in unity with nature                |  | 6      | 1.1                    | 1.8  | 3.5  | 17.0 | 21.8 | 25.1 | 29.6 |
| Altruistic values:                                                        |  |        |                        |      |      |      |      |      |      |
| It is important to him/her/them that every person has equal opportunities |  | 6      | 1.2                    | 0.5  | 1.5  | 9.5  | 16.9 | 24.3 | 46.0 |
| It is important to him/her/them to take care of those who are worse off   |  | 5      | 1.7                    | 2.0  | 2.7  | 17.4 | 26.4 | 24.5 | 25.3 |
| It is important to him/her/them that every person is treated justly       |  | 7      | 0.2                    | 0.6  | 1.2  | 6.2  | 14.0 | 25.7 | 52.1 |
| It is important to him/her/them that there is no war or conflict          |  | 6      | 1.3                    | 1.6  | 2.5  | 14.7 | 17.0 | 23.5 | 39.3 |
| It is important to him/her/them to be helpful to others                   |  | 6      | 0.5                    | 0.3  | 1.0  | 6.4  | 18.4 | 29.8 | 43.6 |
| Hedonic values:                                                           |  |        |                        |      |      |      |      |      |      |
| It is important to him/her/them to have fun                               |  | 6      | 1.2                    | 1.2  | 2.6  | 16.4 | 25.8 | 26.4 | 26.3 |
| It is important to him/her/them to enjoy life's pleasures                 |  | 6      | 0.5                    | 0.7  | 2.2  | 10.4 | 22.9 | 27.7 | 35.5 |
| It is important to him/her/them to do things he/she/they enjoy            |  | 6      | 0.1                    | 0.8  | 1.0  | 6.5  | 21.1 | 29.8 | 40.6 |
| Egoistic values:                                                          |  |        |                        |      |      |      |      |      |      |
| It is important to him/her/them to have control over others' actions      |  | 3      | 21.6                   | 14.3 | 15.1 | 25.6 | 11.4 | 6.7  | 5.4  |
| It is important to him/her/them to have authority over others             |  | 3      | 23.9                   | 16.2 | 17.0 | 24.0 | 9.3  | 5.8  | 3.6  |
| It is important to him/her/them to be influential                         |  | 4      | 6.2                    | 5.6  | 8.1  | 30.7 | 22.7 | 13.2 | 13.5 |
| It is important to him/her/them to have money and possessions             |  | 5      | 7.1                    | 7.6  | 10.0 | 24.4 | 25.4 | 14.4 | 11.1 |
| It is important to him/her/them to work hard and be ambitious             |  | 6      | 1.2                    | 1.8  | 2.8  | 12.7 | 21.4 | 25.2 | 34.8 |

<sup>†</sup> Not at all like me = 1; neutral = 4; very much like me = 7
